# Supplementary material for: Combining Computational Prediction of Cis-Regulatory Elements with a New Enhancer Assay to Efficiently Label Neuronal Structures in the Medaka Fish
Source: PubMed Central journal article supplement (PMC3103512; doi:10.1371/journal.pone.0019747), 2011-05-27
Supplement: pone.0019747.s013.pdf [file pone.0019747.s013.pdf]

| <b>Tissue</b>                | <b>p-values</b> | <b>% of genes expressed in tissue linked to human conserved set</b> | <b>% of genes expressed in tissue linked to background</b> |
|------------------------------|-----------------|---------------------------------------------------------------------|------------------------------------------------------------|
| midbrain hindbrain boundary  | 2.94E-05        | 20.95                                                               | 10.99                                                      |
| hindbrain                    | 0.0002373       | 55.71                                                               | 43.25                                                      |
| brain                        | 0.0005317       | 74.29                                                               | 63.2                                                       |
| diencephalon                 | 0.000836        | 53.81                                                               | 42.59                                                      |
| neural rod                   | 0.001223        | 24.29                                                               | 15.84                                                      |
| central nervous system       | 0.001814        | 76.19                                                               | 66.6                                                       |
| spinal cord                  | 0.002601        | 42.86                                                               | 33.21                                                      |
| presumptive diencephalon     | 0.003885        | 10.48                                                               | 5.533                                                      |
| neural keel                  | 0.004098        | 34.29                                                               | 25.71                                                      |
| neural tube                  | 0.004157        | 42.86                                                               | 33.72                                                      |
| hypothalamus                 | 0.004558        | 14.29                                                               | 8.544                                                      |
| midbrain                     | 0.006946        | 53.33                                                               | 44.48                                                      |
| pectoral fin bud             | 0.01151         | 10.48                                                               | 6.116                                                      |
| pectoral fin                 | 0.01156         | 26.19                                                               | 19.44                                                      |
| optic tectum                 | 0.01301         | 36.67                                                               | 29.19                                                      |
| forebrain                    | 0.01667         | 57.62                                                               | 49.92                                                      |
| neural plate                 | 0.02073         | 31.9                                                                | 25.32                                                      |
| otic vesicle                 | 0.0292          | 20                                                                  | 14.88                                                      |
| cerebellum                   | 0.04099         | 14.76                                                               | 10.62                                                      |
| anterior neural keel         | 0.05104         | 22.38                                                               | 17.7                                                       |
| retinal ganglion cell layer  | 0.05531         | 14.76                                                               | 10.92                                                      |
| retinal neural layer         | 0.0613          | 20.95                                                               | 16.60                                                      |
| anterior neural rod          | 0.06567         | 10                                                                  | 6.967                                                      |
| alar plate midbrain          | 0.06612         | 10.95                                                               | 7.787                                                      |
| tegmentum                    | 0.0667          | 24.76                                                               | 20.22                                                      |
| ectoderm                     | 0.08338         | 21.43                                                               | 17.45                                                      |
| midbrain neural keel         | 0.1047          | 15.71                                                               | 12.52                                                      |
| nervous system               | 0.1471          | 17.62                                                               | 14.75                                                      |
| midbrain neural tube         | 0.1641          | 20                                                                  | 17.17                                                      |
| hindbrain neural plate       | 0.1659          | 10.95                                                               | 8.780                                                      |
| optic vesicle                | 0.1706          | 15.71                                                               | 13.21                                                      |
| posterior neural plate       | 0.1805          | 10.95                                                               | 8.890                                                      |
| neuron                       | 0.1815          | 15.24                                                               | 12.86                                                      |
| anterior neural tube         | 0.1991          | 20                                                                  | 17.51                                                      |
| vestibuloauditory system     | 0.2206          | 11.9                                                                | 10.06                                                      |
| pronephros                   | 0.2261          | 16.67                                                               | 14.58                                                      |
| retina                       | 0.2342          | 35.71                                                               | 33.09                                                      |
| pronephric duct              | 0.2681          | 11.9                                                                | 10.37                                                      |
| telencephalon                | 0.2686          | 33.33                                                               | 31.10                                                      |
| epithalamus                  | 0.2814          | 12.38                                                               | 10.91                                                      |
| immature eye                 | 0.3067          | 25.24                                                               | 23.52                                                      |
| lateral line system          | 0.3926          | 12.86                                                               | 12.04                                                      |
| renal system                 | 0.4163          | 17.62                                                               | 16.87                                                      |
| visual system                | 0.4214          | 45.24                                                               | 44.31                                                      |
| pharyngeal arch              | 0.4331          | 22.38                                                               | 21.69                                                      |
| somite                       | 0.4568          | 21.43                                                               | 20.92                                                      |
| eye                          | 0.4731          | 42.38                                                               | 41.91                                                      |
| cranium                      | 0.4779          | 17.62                                                               | 17.28                                                      |
| peripheral nervous system    | 0.4981          | 12.86                                                               | 12.66                                                      |
| basal plate midbrain         | 0.5156          | 11.9                                                                | 11.81                                                      |
| ventricular zone             | 0.5807          | 10                                                                  | 10.25                                                      |
| ventricular system           | 0.585           | 10.95                                                               | 11.24                                                      |
| pharyngeal arch 3-7 skeleton | 0.6492          | 10.95                                                               | 11.62                                                      |
| cardiovascular system        | 0.6713          | 11.43                                                               | 12.25                                                      |
| pharyngeal arch 3-7          | 0.677           | 10.95                                                               | 11.79                                                      |
| notochord                    | 0.7396          | 14.76                                                               | 16.20                                                      |
| trunk                        | 0.8863          | 39.05                                                               | 42.99                                                      |
| head                         | 0.9579          | 53.81                                                               | 59.54                                                      |
| mesoderm                     | 0.9594          | 23.81                                                               | 29.04                                                      |
| whole organism               | 0.9922          | 55.71                                                               | 63.71                                                      |
| digestive system             | 0.9971          | 16.19                                                               | 23.88                                                      |
| endocrine system             | 0.9987          | 12.38                                                               | 20.13                                                      |
