# Supplementary material for: Combining Computational Prediction of Cis-Regulatory Elements with a New Enhancer Assay to Efficiently Label Neuronal Structures in the Medaka Fish
Source: PubMed Central journal article supplement (PMC3103512; doi:10.1371/journal.pone.0019747), 2011-05-27
Supplement: pone.0019747.s016.pdf [file pone.0019747.s016.pdf]

|                     | Factor name (premod) | factor name (Danio rerio) | PWM                                                                                  | Zfin Annotation (Curated)        |
|---------------------|----------------------|---------------------------|--------------------------------------------------------------------------------------|----------------------------------|
| <b>MEDMOD062537</b> | foxd1                | foxd1                     | 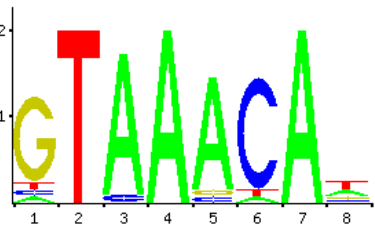    | Forebrain and more               |
|                     | sox2                 | Sox2                      |     | Forebrain and more               |
|                     | sox9                 | Sox9b                     |     | Forebrain and more               |
|                     | myc                  | myca                      |    | Forebrain and more               |
| <b>MEDMOD045693</b> | pou3f2               | pou3f2                    |  | diencephalon and more structures |
|                     | dl                   | dla                       |   | diencephalon and more structures |
|                     | dl                   | dlb                       |   | diencephalon and more structures |
|                     | HNF-6                | onecut1                   |   | diencephalon and more structures |
|                     | Fos                  | Fos                       |   | diencephalon and more structures |
| <b>MEDMOD086628</b> | Mafb                 | Mafba (mal)               |   | Rhombomeres only                 |
|                     | Mef2a                | mef2a                     |  | Hindbrain and more               |
|                     | sox9                 | sox9b                     |   | Rhombomeres and more             |
|                     | Evi1                 | mecom                     |   | Hindbrain and more               |
|                     | Elf1                 | efna2                     |   | Hindbrain and more               |
|                     | En1                  | Eng1b                     |   | Hindbrain and more               |
|                     | Lhx3                 | Lhx3                      |   | Hindbrain and more               |
|                     | Msx1                 | Msxe                      |   | Hindbrain and more               |
