# Supplementary material for: Combining Computational Prediction of Cis-Regulatory Elements with a New Enhancer Assay to Efficiently Label Neuronal Structures in the Medaka Fish
Source: PLoS One. 2011 May 27;6(5):e19747. doi: 10.1371/journal.pone.0019747 (PMC3103512; doi:10.1371/journal.pone.0019747)
Supplement: Table S5 — Injection success rate. “Alive” column corresponds to the number of injected embryos which passed gastrulation. “Expression” corresponds to the number of embryos with expression pattern in the lens (successful injection) and “Specific Expression” corresponds to the number of embryos with reproducible expression pattern excluding the lens specific pattern. (PDF) [file pone.0019747.s014.pdf]

|                               |  |  |  |  |  |
|-------------------------------|--|--|--|--|--|
| <b>Supplementary Table S5</b> |  |  |  |  |  |
|-------------------------------|--|--|--|--|--|

| Constructs              | Injected Eggs | Alive | Expression (lens) | Specific Expression | Percentage of Expression | Percentage of Specific Expression |
|-------------------------|---------------|-------|-------------------|---------------------|--------------------------|-----------------------------------|
| hsp70                   | 259           | 189   | 101               | 101                 | 53.44                    | 100.00                            |
| MEDMOD021953-hsp70::GFP | 178           | 84    | 32                | 20                  | 38.10                    | 62.50                             |
| MEDMOD062451-hsp70::GFP | 294           | 233   | 67                | 48                  | 28.76                    | 71.64                             |
| MEDMOD074008-hsp70::GFP | 157           | 111   | 53                | 35                  | 47.75                    | 66.04                             |
| MEDMOD021885-hsp70::GFP | 297           | 249   | 84                | 27                  | 33.73                    | 32.14                             |
| MEDMOD070042-hsp70::GFP | 166           | 139   | 65                | 36                  | 46.76                    | 55.38                             |
| MEDMOD046007-hsp70::GFP | 167           | 119   | 43                | 20                  | 36.13                    | 46.51                             |
| MEDMOD046561-hsp70::GFP | 74            | 69    | 32                | 0                   | 46.38                    | 0.00                              |
| MEDMOD045693-hsp70::GFP | 180           | 88    | 19                | 12                  | 21.59                    | 63.16                             |
| MEDMOD086628-hsp70::GFP | 97            | 76    | 35                | 26                  | 46.05                    | 74.29                             |
| MEDMOD062537-hsp70::GFP | 205           | 151   | 56                | 32                  | 37.09                    | 57.14                             |

|                         |     |    |    |    |       |       |
|-------------------------|-----|----|----|----|-------|-------|
|                         |     |    |    |    |       |       |
| MEDMOD021445-hsp70::GFP | 79  | 74 | 43 | 27 | 58.11 | 62.79 |
| MEDMOD092210-hsp70::GFP | 82  | 61 | 34 | 20 | 55.74 | 58.82 |
| MEDMOD062490-hsp70::GFP | 107 | 87 | 65 | 37 | 74.71 | 56.92 |
| MEDMOD057815-hsp70::GFP | 49  | 45 | 23 | 19 | 51.11 | 82.61 |
| MEDMOD021442-hsp70::GFP | 60  | 48 | 17 | 14 | 35.42 | 82.35 |
| MEDMOD093196-hsp70::GFP | 39  | 35 | 12 | 10 | 34.29 | 83.33 |
| MEDMOD062408-hsp70::GFP | 104 | 79 | 49 | 38 | 62.03 | 77.55 |
| MEDMOD047799-hsp70::GFP | 65  | 49 | 29 | 28 | 59.18 | 96.55 |
| MEDMOD083481-hsp70::GFP | 75  | 64 | 32 | 23 | 50.00 | 71.88 |
| MEDMOD062206-hsp70::GFP | 72  | 68 | 44 | 25 | 64.71 | 56.82 |
